# Supplementary material
Source: Research Square preprint supplement (doi:10.21203/rs.3.rs-6866836/v1)
Supplement: Supplementary file 1 [file 290576f95adb6d5854c2c5de.docx]

| Software and algorithms | | |
| --- | --- | --- |
| BC_cfDNA | This paper | https://github.com/omixscience/BC_cfDNA |
| FastQC v0.12.1 |  | https://www.bioinformatics.babraham.ac.uk/projects/fastqc |
| Cutadapt v4.5 | DOI:10.14806/ej.17.1.200 . | https://github.com/marcelm/cutadapt |
| Ktrim v1.4.1 | PMID: 32159761 | https://github.com/hellosunking/Ktrim |
| BWA-MEM v0.7.17 | PMID: 19451168, 20080505 | https://github.com/lh3/bwa |
| Samtools v1.9 | PMID: 33590861 | https://github.com/samtools/samtools |
| Deeptools v3.1.2 | PMID: 27079975 | https://github.com/deeptools/deepTools |
| LIQUORICE v0.5.4 | PMID: 36699368, 34050156 | https://github.com/epigen/LIQUORICE |
| ichorCNA | PMID: 29109393 | https://github.com/broadinstitute/ichorCNA |
| Griffin v0.2.0 | PMID: 36463275 | https://griffin.apache.org/docs/quickstart-cn.html |
| ARTEMIS | PMID: 38478628 | https://github.com/cancer-genomics/artemis2024 |
| pROC | PMID: 21414208 | https://xrobin.github.io/pROC/ |
| ggplot2 | https://doi.org/10.1111/j.1467-985X.2010.00676_9.x | https://ggplot2.tidyverse.org/ |
| confusionMatrix v6.0.94 |  | https://github.com/m-clark/confusionMatrix |
| preProcess v 1.2.2 |  | https://github.com/hplgit/preprocess |
| R v. 4.4.1 | CRAN | https://cran.r-project.org/ |
