# Supplementary material
Source: Research Square preprint supplement (doi:10.21203/rs.3.rs-6866836/v1)
Supplement: Supplementary file 2 [file 61855c576ed9891ba94d5f93.xlsx]

## Sheet: Supplementary Table 1
Center name	SAHZU	HZFH	ZJTCM	LHLI	WHZJU	XFHCC	Total
Benign patients	61	47	5	0	0	176	289
Malignant patients	251	157	41	34	20	0	503
Age (years)
Mean ± SD	53.90±12.78	53.34±12.71	55.24±12.33	55.53±12.19	55.60±12.27	54.48±10.56	53.38±12.68
Range	23-92	18-92	25-92	27-92	26-92	25-71	18-92
Molecular subtype, n (%) Without DCIS
ER+/PR+HER2-	132 (56.4%)	92 (67.2%)	21 (52.5%)	19 (55.9%)	14 (73.7%)		278 (59.9%)
HER2+	74 (31.6%)	27 (19.7%)	14 (35.0%)	9 (26.5%)	4 (21.0%)		128 (27.6%)
TNBC	28 (12.0%)	18 (13.1%)	5 (12.5%)	6 (17.6%)	1 (5.3%)		58 (12.5%)
Pathological T stage, n (%)
Tis	17 (6.8%)	20 (12.7%)	1 (2.4%)	0	1 (5.0%)		39 (7.8%)
T1	148 (58.9%)	70 (44.6%)	24 (58.5%)	22 (64.7%)	12 (60.0%)		276 (54.9%)
T2	79 (31.5%)	62 (39.5%)	12 (29.3%)	12 (35.3%)	7 (35.0%)		172 (34.2%)
T3	4 (1.6%)	5 (3.2%)	4 (9.8%)	0	0		13 (2.6%)
T4	3 (1.2%)	0	0	0	0		3 (0.6%)
Pathological N stage, n (%)
N0	171 (68.1%)	114 (72.6%)	27 (65.8%)	25 (73.5%)	12 (60.0%)		349 (69.4%)
N1	61 (24.3%)	18 (11.5%)	10 (24.4%)	7 (20.6%)	6 (30.0%)		102 (20.3%)
N2	12 (4.8%)	22 (14.0%)	2 (4.9%)	2 (5.9%)	1 (5.0%)		39 (7.8%)
N3	7 (2.8%)	3 (1.9%)	2 (4.9%)	0	1 (5.0%)		13 (2.6%)
Clinical Stage, n (%)
Stage 0	17 (6.8%)	20 (12.7%)	1 (2.4%)	0	1 (5.0%)		39 (7.8%)
Stage I	112 (44.6%)	61 (38.9%)	18 (43.9%)	22 (64.7%)	8 (40.0%)		221 (43.9%)
Stage II	99 (39.4%)	51 (32.5%)	16 (39.0%)	10 (29.4%)	9 (45.0%)		185 (36.8%)
Stage III	23 (9.2%)	25 (15.9%)	6 (14.7%)	2 (5.9%)	2 (10.0%)		58 (11.5%)
Supplementary Table 1. Clinical and pathological characteristics of the TuFEst cohort
