# Supplementary material
Source: Research Square preprint supplement (doi:10.21203/rs.3.rs-6866836/v1)
Supplement: Supplementary file 3 [file 96bca4afd573b5313d1c284e.docx]

**Supplementary Table 3. Baseline clinical and pathological features of Cancer Score-High and Low groups**

| Characteristics | Low | High | P value |
| --- | --- | --- | --- |
| n | 39 | 40 |  |
| Age, mean ± sd | 53.821 ± 10.535 | 55.371 ± 13.231 | 0.577 |
| T.stage, n (%) |  |  | 1.000 |
| T1 | 26 (32.9%) | 27 (34.2%) |  |
| T2 | 12 (15.2%) | 13 (16.5%) |  |
| T3 | 1 (1.3%) | 0 (0%) |  |
| N.stage, n (%) |  |  | 0.853 |
| N0 | 27 (34.2%) | 29 (36.7%) |  |
| N1 | 8 (10.1%) | 9 (11.4%) |  |
| N2 | 2 (2.5%) | 1 (1.3%) |  |
| N3 | 2 (2.5%) | 1 (1.3%) |  |
| Stage, n (%) |  |  | 0.677 |
| I | 20 (25.3%) | 22 (27.8%) |  |
| II | 15 (19%) | 16 (20.3%) |  |
| III | 4 (5.1%) | 2 (2.5%) |  |
| ER, n (%) |  |  | 0.678 |
| - | 11 (13.9%) | 13 (16.5%) |  |
| + | 28 (35.4%) | 27 (34.2%) |  |
| PR, n (%) |  |  | 0.894 |
| - | 16 (20.3%) | 17 (21.5%) |  |
| + | 23 (29.1%) | 23 (29.1%) |  |
| HER2, n (%) |  |  | 0.750 |
| - | 25 (31.6%) | 27 (34.2%) |  |
| + | 14 (17.7%) | 13 (16.5%) |  |
