# Supplementary material
Source: Research Square preprint supplement (doi:10.21203/rs.3.rs-6866836/v1)
Supplement: Supplementary file 4 [file e01cdb1dca59d36ac1336bf5.xlsx]

## Sheet: Supplementary Table 2
Patient ID	Center	Primary Subtype	Metastatic Subtype	TuFEst-MS Predicted Subtype	Concordance of Primary&Metastasis(Y/N)	Site of Metastasis
1	SAHZU	ER+/PR+HER2−	ER+/PR+HER2−	ER+/PR+HER2−	Y	Chest wall
2	SRRZU	ER+/PR+HER2−	TNBC	TNBC	N	Lungs
3	SRRZU	HER2+	HER2+	ER+/PR+HER2−	Y	Bone
4	SAHZU	HER2+	TNBC	TNBC	N	Liver
5	SRRZU	ER+/PR+HER2−	TNBC	TNBC	N	Chest wall
6	SAHZU	HER2+	TNBC	TNBC	N	Chest wall
7	SRRZU	TNBC	TNBC	TNBC	Y	Lungs
8	SAHZU	TNBC	TNBC	TNBC	Y	Liver
9	SRRZU	ER+/PR+HER2−	TNBC	TNBC	N	Bone
10	SAHZU	ER+/PR+HER2−	TNBC	HER2+	N	Chest wall
11	SRRZU	ER+/PR+HER2−	ER+/PR+HER2−	ER+/PR+HER2−	Y	Bone
12	SAHZU	TNBC	TNBC	TNBC	Y	Lungs
13	SRRZU	ER+/PR+HER2−	ER+/PR+HER2−	ER+/PR+HER2−	Y	Bone
14	SAHZU	HER2+	ER+/PR+HER2−	ER+/PR+HER2−	N	Bone
15	SRRZU	HER2+	HER2+	HER2+	Y	Cervical lymph node
16	SAHZU		ER+/PR+HER2−	ER+/PR+HER2−		Bone
17	SAHZU	TNBC	TNBC	HER2+	Y	Brain
18	SRRZU	TNBC	TNBC	TNBC	Y	Bone
19	SAHZU	ER+/PR+HER2−	ER+/PR+HER2−	ER+/PR+HER2−	Y	Bone
20	SAHZU	TNBC	ER+/PR+HER2−	ER+/PR+HER2−	N	Bone
21	SAHZU	HER2+	HER2+	HER2+	Y	Chest wall
Supplementary Table 2. Clinical and molecular characteristics of oligometastatic breast cancer patients used for subtype prediction evaluation
